# Supplementary material for: Bioactive Compounds in Ficus Fruits, Their Bioactivities, and Associated Health Benefits: A Review
Source: Hindawi journal article supplement (doi:10.1155/2022/6597092), 2022-04-26

***Review Article*: Bioactive compounds in *Ficus* fruits their bioactivities and associated health benefits-A review**

Ankita Walia1, Naveen Kumar1*, Rajat Singh1, Harish Kumar1, Vikas Chopra2, Ravinder Kaushik3, Avvaru Praveen Kumar4*

**Highlights:**

- Various *Ficus* fruit species have been reviewed for their bioactive compounds and associated health benefits.
- Application of fig as a valuable source of functional ingredients is outlined.
- Technological properties present in figs with relevant industrial interests are highlighted.

**Graphical Abstract**


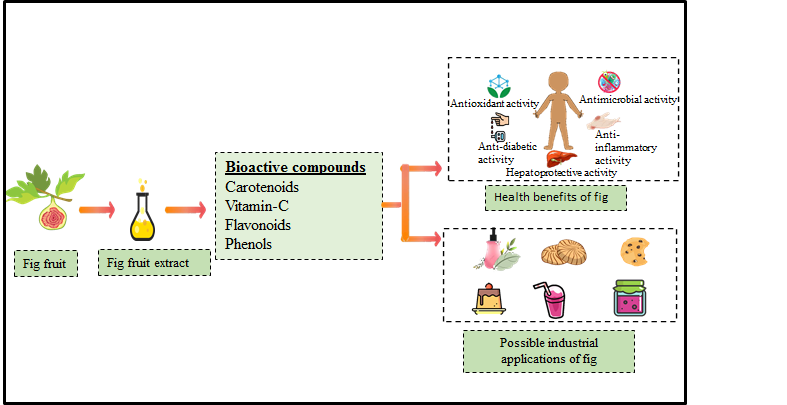

Supplement: f1 [file 6597092.f1.docx]
